# Supplementary material for: Controllable Introduction of Surface Defects on CH3NH3PbI3 Perovskite
Source: MDPI journal article supplement (doi:10.3390/nano12061002), 2022-03-18
Supplement: s1 [file s1]

# Controllable Introduction of Surface Defects on $\text{CH}_3\text{NH}_3\text{PbI}_3$ Perovskite

Sushu Wan <sup>1</sup>, Yajie Zhu <sup>1</sup>, Daocheng Hong <sup>1,2</sup> and Yuxi Tian <sup>1,\*</sup>

<sup>1</sup> Key Laboratory of Mesoscopic Chemistry of MOE, School of Chemistry and Chemical Engineering and Jiangsu Key Laboratory of Vehicle Emissions Control, Nanjing University, Nanjing 210023, China; wansushu@outlook.com (S.W.); yajie.zhu@smail.nju.edu.cn (Y.Z.); hdaocheng@gmail.com (D.H.)

<sup>2</sup> Key Laboratory for Advanced Technology in Environmental Protection of Jiangsu Province, Yancheng Institute of Technology, Yancheng 224051, China

\* Correspondence: tyx@nju.edu.cn

## 1. Morphology of samples with and without BQ treatment

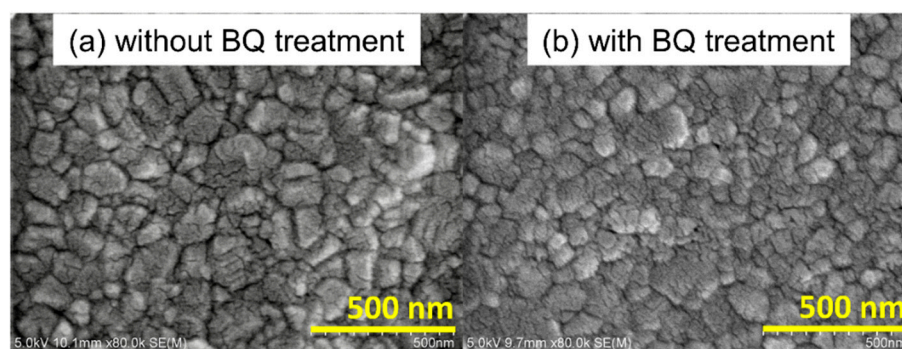

**Figure S1.** Morphology of  $\text{MAPbI}_3$  thin films (a) without BQ treatment and (b) with BQ treatment. The thin film consists of submicron-sized polycrystalline. The morphology shows no significant difference with and without BQ treatment indicating that BQ treatment would not destroy the crystal structure.

## 2. Effects of BQ solution treatment

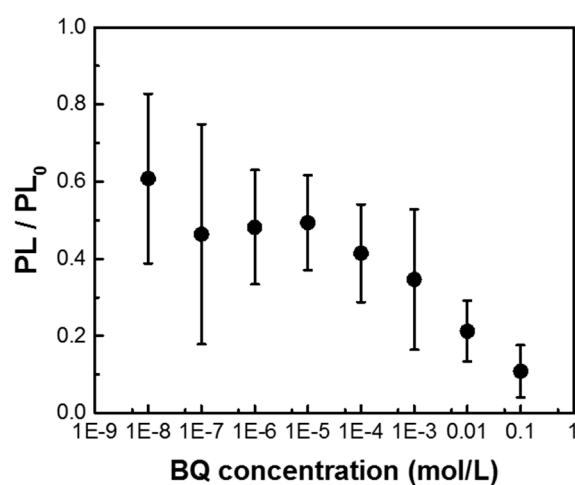

**Figure S2.** PL quenching efficiency of  $\text{MAPbI}_3$  thin films when treated with BQ solutions of different concentrations.

### 3. Dependence of BQ treatment efficiency on excitation intensity

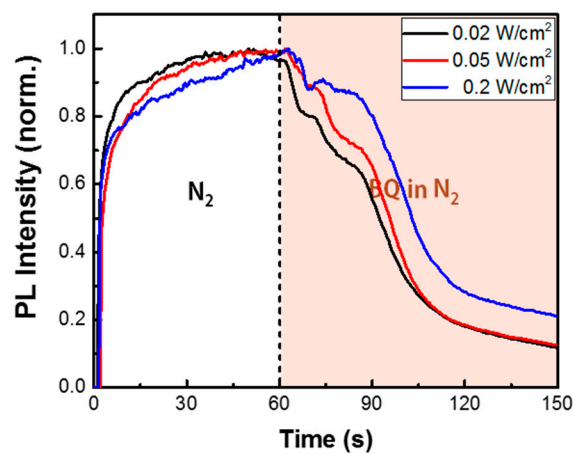

**Figure S3.** The PL kinetics during BQ vapor treatment under different excitation power. The flow velocity of BQ/N<sub>2</sub> is 5 liters per minute during the measurement.

### 4. Reversible PL response in N<sub>2</sub> and N<sub>2</sub>/BQ mixture

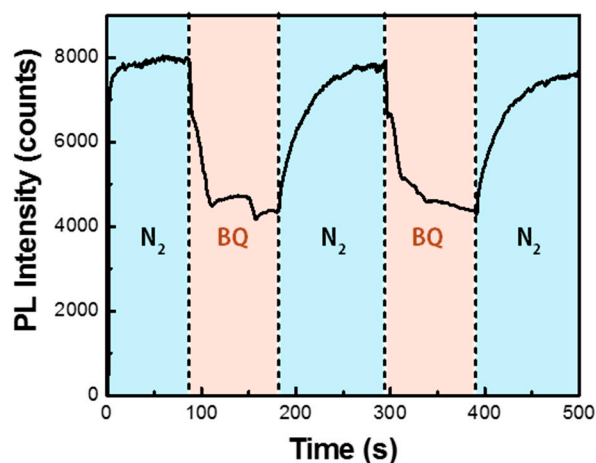

**Figure S4.** PL kinetics show reversible response when the atmosphere was switched between pure N<sub>2</sub> and BQ/N<sub>2</sub>.

### 5. PL spectra before and after treatment

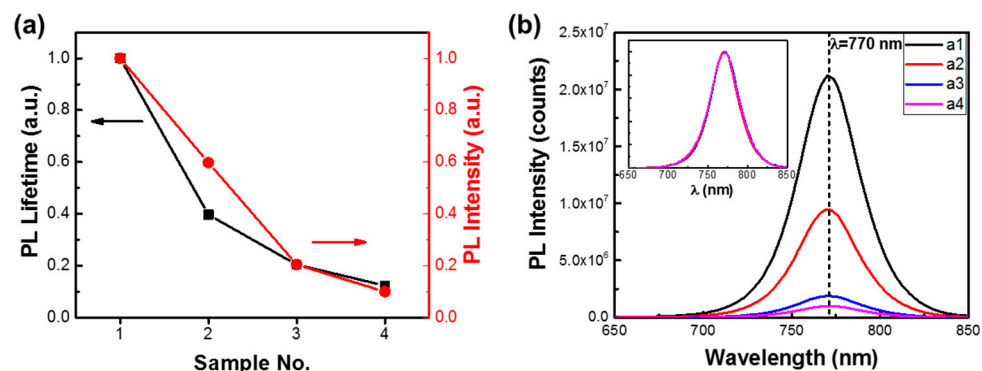

**Figure S5.** (a) PL lifetime (black square) and PL intensity (red circle) decay trends and (b) PL spectra of four areas in Figure 3a.

## 6. PL response to O<sub>2</sub> and acetone with and without treatment

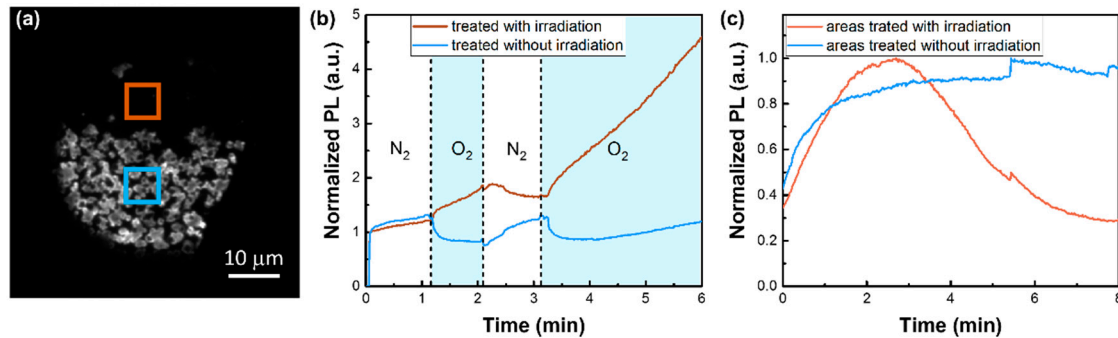

**Figure S6.** (a) PL image showing the after effect of degradation in the mixture of oxygen and acetone. The upper half was treated with BQ vapor under light irradiation while the lower half without light irradiation; (b) PL response under periodical switching between O<sub>2</sub> and N<sub>2</sub> showing different trends; (c) PL kinetics showing different responses in the mixture of oxygen and acetone. The region treated with light irradiation quickly degraded.

## 7. Initial carrier density and deep trap concentration

The initial carrier density can be estimated according to the excitation fluence  $I_0$  and absorption coefficient  $\alpha$ :

$$n_0 = \frac{I_0(1 - e^{-\alpha d})}{h\nu \cdot d} \quad (1)$$

For polycrystalline thin films containing  $2 \times 2 \times 2 \mu\text{m}^3$  micro-crystals, we can take  $1 - e^{-\alpha d}$  approximately as 1. The excitation fluence  $I_0$  of our pulsed laser is  $2.5 \mu\text{J}/\text{cm}^2$  and the frequency of 532 nm photon is  $5.64 \times 10^{14} \text{ s}^{-1}$ . Thus, the initial charge carrier density can be estimated to be  $3.3 \times 10^{16} \text{ cm}^{-3}$ .

Under such moderate charge carrier density, we can ignore the Auger recombination process and get the differential equation of charge carrier recombination as:

$$\frac{dn}{dt} = -k_1 n - k_2 n^2 - k_{NR} n N_T \quad (2)$$

where  $k_1$  is the monomolecular recombination rate constant,  $k_2$  is the bimolecular recombination rate constant,  $k_{nr}$  is the trap-mediated non-radiative recombination rate constant and  $N_T$  is the concentration of quenching defects. Taking both mono- and bi-molecular recombination process as radiative, we can get the PL intensity as:

$$\text{PL} = \int (k_1 n + k_2 n^2) dt \quad (3)$$

We did the simulation with parameters same as the reference<sup>2</sup> where  $k_1 = 1 \times 10^6 \text{ s}^{-1}$ ,  $k_2 = 2.5 \times 10^{-10} \text{ cm}^3 \cdot \text{s}^{-1}$ ,  $k_{nr} = 2.5 \times 10^{-10} \text{ cm}^3 \cdot \text{s}^{-1}$ . By fitting the PL decay curves with MATLAB, we can get the deep defects densities in the four treated areas.

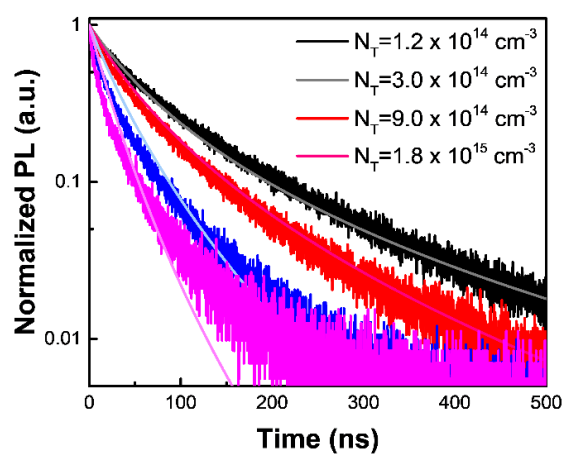

**Figure S7.** Experimental and fitting results based on the above model of the four treated areas.
